# Supplementary material for: Use of Resazurin To Rapidly Enumerate Bdellovibrio and Like Organisms and Evaluate Their Activities
Source: PubMed Central journal article supplement (PMC9241754; doi:10.1128/spectrum.00825-22), 2022-06-13
Supplement: spectrum.00825-22-s0001.pdf [file spectrum.00825-22-s0001.pdf]

1

2 Supplemental Information

3 for

4 **Resazurin to Rapidly Enumerate *Bdellovibrio*-and-Like**

5 **Organisms (BALOs) and Evaluate Their Activities**

6 Running Title: Quick fluorescence-based estimation of BALO numbers

7

8 Hyochan Jang<sup>a</sup>, Wonsik Mun<sup>a</sup>, Seong Yeol Choi\* and Robert J. Mitchell\*

9 School of Life Sciences, Ulsan National Institute of Science and Technology (UNIST), Ulsan 44919,

10 South Korea

11 <sup>a</sup> – These authors contributed equally to this study

12

13

14 **Contact Information**

15 Email: [aster6432@unist.ac.kr](mailto:aster6432@unist.ac.kr) (SYC); [esgott@unist.ac.kr](mailto:esgott@unist.ac.kr) (RJM)

16 Tel: +82) 052-217-2513

17

18 **Table S1.** Bacterial strains used in this study

| Bacterial Strain                        | Characteristics                                              |
|-----------------------------------------|--------------------------------------------------------------|
| <i>Bdellovibrio bacteriovorus</i> HD100 | Bacterial predator – Type-strain                             |
| <i>Bdellovibrio bacteriovorus</i> 109J  | Bacterial predator                                           |
| <i>Halobacteriovorax</i> str. JA-1      | Bacterial predator isolated from near Jangheung, South Korea |
| <i>Halobacteriovorax</i> str. JA-2      | Bacterial predator isolated from near Jangheung, South Korea |
| <i>Escherichia coli</i> MG1655/pUCDK    | Prey strain for the <i>Bdellovibrio</i> predatory strains    |
| <i>Klebsiella pneumoniae</i> NCCP 15782 | Clinical pathogen isolated from human blood samples          |

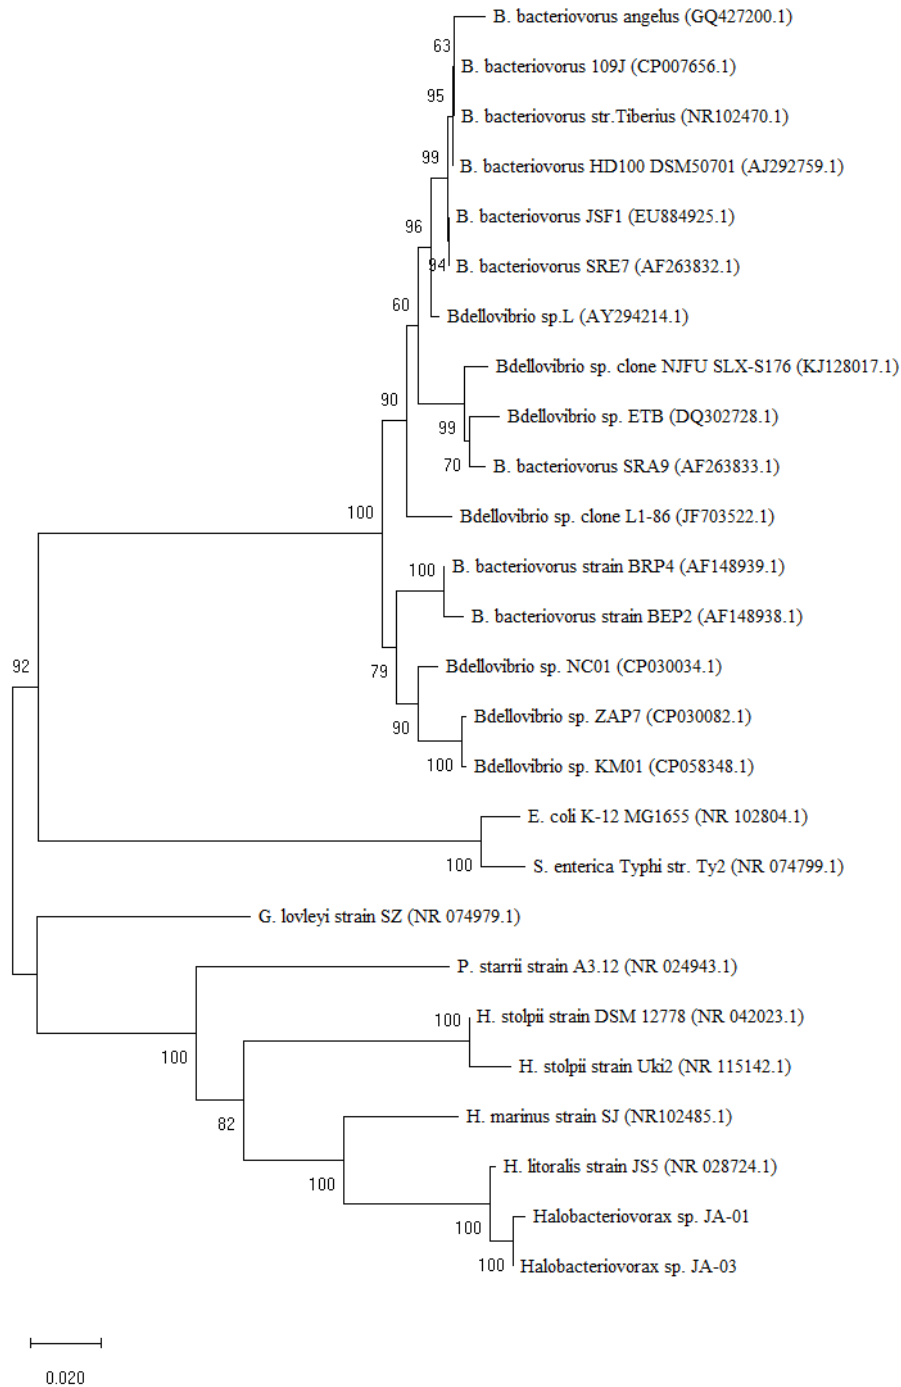

19

20 **Figure S1.** Phylogenetic analyses for *Halobacteriovorax* str. JA-1 and JA-3. The evolutionary  
 21 history was inferred using the Neighbor-Joining method. The optimal tree with the sum of  
 22 branch length = 0.67038433 is shown. The percentage of replicate trees in which the associated  
 23 taxa clustered together in the bootstrap test (2000 replicates) are shown next to the branches.

24 The tree is drawn to scale, with branch lengths in the same units as those of the evolutionary  
25 distances used to infer the phylogenetic tree. The evolutionary distances were computed using  
26 the Jukes-Cantor method and are in the units of the number of base substitutions per site. The  
27 analysis involved 23 nucleotide sequences. All positions containing gaps and missing data were  
28 eliminated. There were a total of 956 positions in the final dataset. Evolutionary analyses were  
29 conducted in MEGA7.

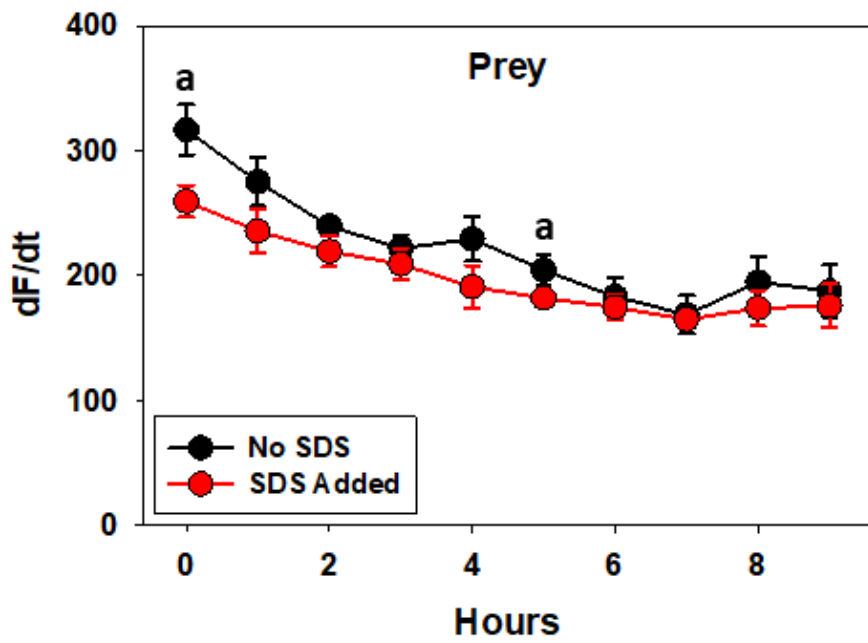

30

31 **Figure S2.** Addition of SDS (0.02% (w:v) final) has only a mild impact of the resorufin  
 32 fluorescence from *E. coli*, confirming this prey is not negatively impacted by this surfactant.

33

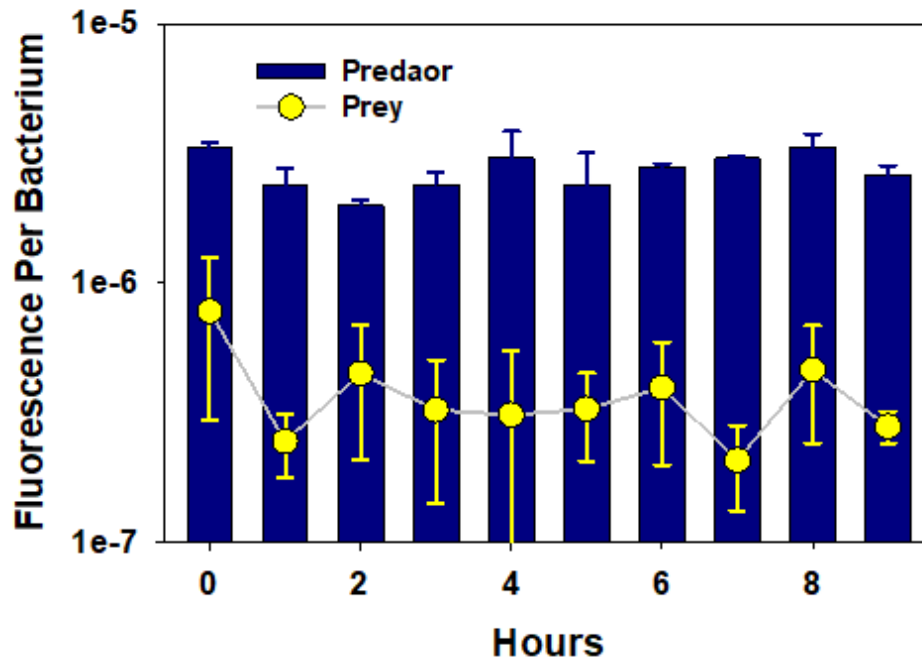

34

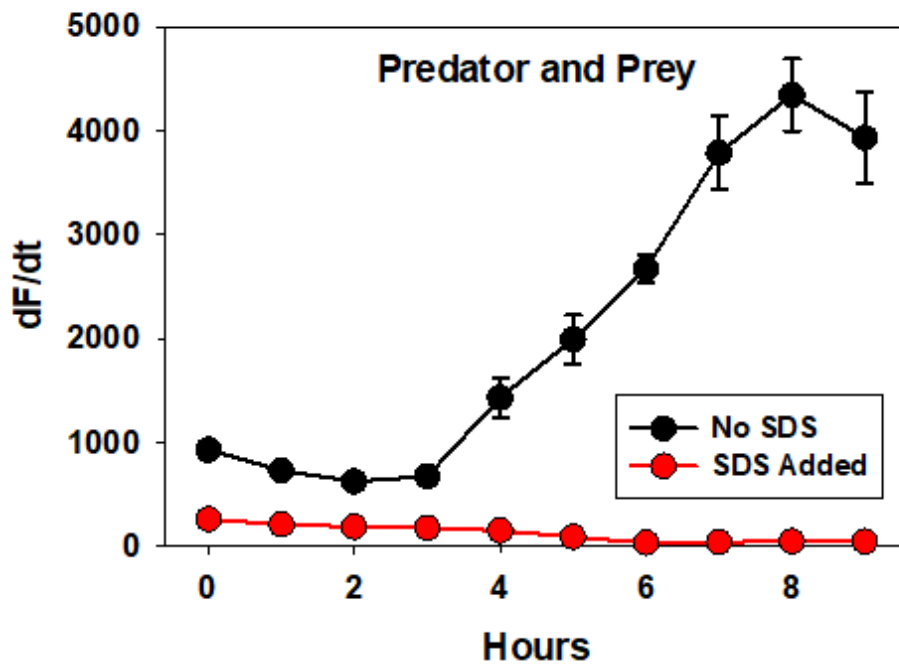

35

36 **Figure S3.** Resorufin fluorescence generated per bacterium, showing the significantly higher  
 37 (7-fold) fluorescence signal from *B. bacteriovorus* HD100 than *E. coli*. The samples were taken  
 38 at each hour during the predation tests. For the prey, these samples had no predator or SDS  
 39 addition. For the predator, the values were calculated based on the difference after SDS  
 40 addition (Lower). Each was divided by the measured viable counts at each time point. ( $n = 3$ )

## 41 **Materials and Methods**

### 42 **Isolation and Identification of the *Halobacteriovorax* Strains**

43 Samples of the tidal flats were taken south of Jangheung near Sumoon, South Korea. These  
44 samples (soil and water) were incubated with shaking at 250 rpm and 30°C for two hours. After  
45 centrifugation (500xg, 5 min) to remove the soil, the supernatant was filtered (0.45 µm syringe  
46 filter, Millipore, USA) to remove any large bacterial cells. To the filtrate, *Klebsiella*  
47 *pneumoniae* NCCP 15782, a septicemia-related pathogen, was added to an optical density (600  
48 nm) of 1.0. The cultures were grown under shaking (250 rpm) at 30°C for several days until  
49 the optical density (OD 600 nm) cleared (below 0.2). The cultures were then filtered (0.45 µm  
50 syringe filter, Millipore, USA) to remove any remaining prey and bdelloplasts. The filtrate was  
51 diluted in 35% artificial seawater (ASW) and added to top agar made with the same media and  
52 prey bacterial strain added. The composition of ASW (100%) was described previously  
53 (Artificial Seawater (2012)). These plates were incubated at 30°C for up to a week to allow  
54 plaques to form.

55

56 Individual plaques were inoculated into sterile 35% artificial seawater (ASW), *i.e.*, with an  
57 osmolality between 300 and 350 mOsm/kg, with the same prey to initiate predation once more.  
58 Once the culture OD cleared, stocks were prepared and the predator was stored as a bdelloplast  
59 formulation in 20% glycerol and -80°C using the same pathogen as the prey. As needed, fresh  
60 plaques of these strains were grown. Subcultures of these isolates were always grown using  
61 30% artificial seawater (ASW; 350 mOsm/kg) with *K. pneumoniae* NCCP 15782 as the prey.  
62 After obtaining pure cultures as described above, the newly isolated predators were then  
63 identified via 16S rDNA sequencing using the universal primer 27F/1492R set as described  
64 previously (Wen et al., 2009; Monnappa et al., 2016) followed by phylogenetic analysis with  
65 MEGAversion 6 software (Tamura et al., 2013) (Figure S1).

66

## 67 **Growth of the Bacterial Strains**

68 All of the bacterial strains used in this study are listed in Table S1. The prey bacteria used to  
69 culture the *B. bacteriovorus* strains was *E. coli* MG1655 as described previously (Monnappa  
70 et al., 2014; Im et al., 2018) while *K. pneumoniae* NCCP 15782 was used for the  
71 *Halobacteriovorax* isolates. Briefly, each prey was cultivated overnight in Lysogeny Broth (LB)  
72 (Difco BD, USA) at 30°C and 250 rpm in a shaking incubator. The prey cells were then pelleted  
73 (2,200 x g, 10 min), washed with HEPES buffer (25 mM, pH 7.4) with CaCl<sub>2</sub> and MgCl<sub>2</sub> added  
74 (3 and 2 mM, respectively) and resuspended to an optical density (OD) at 600 nm of 1.0. To  
75 these cultures, the predatory bacteria were added (1:100 dilution) and grown in flask cultures.  
76 After 24 hours, when the optical density was below 0.2, the predated culture was filtered using  
77 0.45 µm syringe filters (Millipore, USA) to remove any surviving prey and bdelloplasts from  
78 the attack-phase predatory cells.

79

## 80 **Resazurin Enumeration of the Predatory Bacterial Strains**

81 The resazurin stock (0.2% (w/v)) was prepared using distilled water and filter-sterilized (0.22  
82 µm syringe filter, Millipore, USA). For the experiments, this stock was diluted 1:3 (v:v) into  
83 HEPES buffer (25 mM, pH 7.4) with CaCl<sub>2</sub> and MgCl<sub>2</sub> added (3 and 2 mM, respectively).  
84 After growth overnight as described above, the predatory cultures were filtered (0.45 µm  
85 syringe filter, Millipore, USA) and serially diluted in either HEPES buffer (*Bdellovibrio*) or  
86 30% ASW (*Halobacteriovorax*). From these dilutions, 200 µl aliquots were transferred into the  
87 wells of a black 96-well plate (Greiner, USA) and 20 µl of the diluted resazurin stock were  
88 added, giving a final concentration of 0.005% resazurin (w/v). The fluorescence from each well  
89 was then immediately read using a plate reader (TECAN, USA; Ex 530nm, Em 580nm). The  
90 plate reader was set to mix the samples, maintain the temperature at 30°C and read the



91 fluorescence signal in each well every ten minutes. Using the fluorescence values obtained, the  
92 change in fluorescence per minute (dF/dt) was calculated manually using the zero- and ten-  
93 minute data as follows:

$$94 \quad \frac{FL_{t=10 \text{ min}} - FL_{t=0 \text{ min}}}{dt (10 \text{ minutes})}$$

95

### 96 **SDS Tests**

97 To perform the SDS sensitivity experiments with *B. bacteriovorus* HD100, these experiments  
98 were performed as described above and previously (Cho et al., 2019) except the predatory  
99 cultures, after 0.45 µm filtration, were diluted ten-fold, *i.e.*, into 180 µl of sterile media  
100 (HEPES buffer alone or HEPES buffer with SDS added) 20 µl of the filtered predatory culture  
101 were added and mixed within the wells of a black 96-well plate (SPL, Korea). For  
102 *Halobacteriovorax* str. JA-1. the same protocol was used except the media used was 25 mM  
103 HEPES in 35% ASW. The plates were then incubated at 30 °C with shaking in a TECAN Spark  
104 plate reader. After one hour, 20 µl of the diluted resazurin were added to each well and the  
105 fluorescence was measured as described above.

106

### 107 **Osmolality tests**

108 The osmolality of the various samples was measured as described previously (Im et al., 2017)  
109 using an Advanced 3220 Freezing-Point Osmometer (Advanced Instruments, USA). Briefly,  
110 to adjust the osmolality of the samples, artificial seawater (ASW) solutions were mixed with  
111 the HEPES preparations to give 0, 25, 50, 75 and 100% ASW.

112

113 The short-term effects of the osmolality on the predators were conducted as described above  
114 for the resazurin tests. After filtration, the predator was diluted into the different media (1:10)  
115 and 200 µl of the culture were incubated in a black 96-well plate (SPL, Korea) at 30 °C with  
116 shaking in a TECAN Spark plate reader. After one hour, 20 µl of the diluted resazurin were  
117 added to each well and the fluorescence was measured as described above.

118

119 To test the impact of the osmolality on 24-h predation, the prey bacteria were grown as  
120 described above, pelleted by centrifugation (13,000 x g, 5 min) and resuspended in the different  
121 ASW media at an OD of 1.0. To this, the predatory filtrate was then added (1:100 dilution).  
122 These samples were then incubated for 24 hours at 30 °C with agitation (250 rpm), after which  
123 the prey and predator viabilities in each media were determined.

124

#### 125 **Predation tests**

126 Predation tests were performed using *B. bacteriovorus* HD100 with *E. coli* MG1655 as the  
127 prey in 25 mM HEPES buffer (pH 7.2) with 3 mM MgCl<sub>2</sub> and 2 mM of CaCl<sub>2</sub> added. The prey  
128 OD was set to 1.0 and the filtered predator was added so that the initial predator-to-prey ratio  
129 was approximately 0.3 (*i.e.*, one predator for three prey). The cultures were incubated at 30 °C  
130 with shaking (250 rpm). Every hour, a sample was taken and used to measure the viabilities  
131 using agar plates for the prey and top agar plates for the predator, as described previously (Cho  
132 et al., 2019). Briefly, for *B. bacteriovorus* HD100, *E. coli* MG1655 was used as the prey and  
133 the top agar consisted of 0.7 % agar prepared using dilute nutrient broth (DNB), *i.e.*, 1/10 NB,  
134 with 3 mM MgCl<sub>2</sub> and 2 mM CaCl<sub>2</sub> added. Similarly, for *Halobacteriovorax* str. JA-1, *K.*  
135 *pneumoniae* NCCP 15782 was used as the prey and the 0.7 % top agar was prepared using  
136 DNB with 35 % ASW added. Further additions of MgCl<sub>2</sub> and CaCl<sub>2</sub> were not needed as they  
137 were already present in the ASW.

138

139 These hourly aliquots were also tested using resazurin, which we performed without treatment  
140 or after a ten-minute treatment with 0.02% SDS. Briefly, 180  $\mu$ l of the culture were mixed with  
141 either 20  $\mu$ l of HEPES buffer or 20  $\mu$ l of HEPES with SDS added. After a ten-minute incubation,  
142 20  $\mu$ l of the diluted resazurin was added and the fluorescence was measured as described above  
143 in black 96-well plates (SPL, Korea).

144

### 145 **Reproducibility and statistical analysis**

146 Unless specified, each experiment was performed in triplicate and the standard deviations are  
147 presented on the graphs as error bars. Normal distribution of each dataset was verified using  
148 the Shapiro-Wilk test. For those samples that did not show a substantial departure from the  
149 normality ( $p > 0.05$ ), the student t-test was used, with significance indicated within the graphs  
150 using: *a* -  $p < 0.05$ ; *b* -  $p < 0.01$ ; *c* -  $p < 0.001$ . For the resorufin fluorescence per predatory  
151 density, Shapiro-Wilk found them to be significant ( $p < 0.05$ ) and, thus, the correlations ( $R^2$   
152 values) between the predatory density and the resorufin fluorescence were calculated using the  
153 Spearman Correlation Test.

154

155

### 156 **References**

157 Artificial Seawater. Cold Spring Harbor Protocols 2012;2012(2).  
158 Cho G, Kwon J, Soh SM, Jang H, Mitchell RJ. Sensitivity of predatory bacteria to different surfactants  
159 and their application to check bacterial predation. Applied Microbiology and Biotechnology  
160 2019;103(19):8169-8178.  
161 Im H, Dwidar M, Mitchell RJ. Bdellovibrio bacteriovorus HD100, a predator of Gram-negative bacteria,  
162 benefits energetically from Staphylococcus aureus biofilms without predation. ISME J  
163 2018;12(8):2090-2095.  
164 Im H, Son S, Mitchell RJ, Ghim C-M. Serum albumin and osmolality inhibit Bdellovibrio bacteriovorus  
165 predation in human serum. Scientific Reports 2017;7(1).

166 Monnappa AK, Bari W, Choi SY, Mitchell RJ. Investigating the Responses of Human Epithelial Cells to  
167 Predatory Bacteria. *Scientific Reports* 2016;6(1).  
168 Monnappa AK, Dwidar M, Seo JK, Hur JH, Mitchell RJ. *Bdellovibrio bacteriovorus* inhibits  
169 *Staphylococcus aureus* biofilm formation and invasion into human epithelial cells. *Sci Rep* 2014;4:3811.  
170 Tamura K, Stecher G, Peterson D, Filipski A, Kumar S. MEGA6: Molecular Evolutionary Genetics  
171 Analysis Version 6.0. *Molecular Biology and Evolution* 2013;30(12):2725-2729.  
172 Wen CQ, Lai XT, Xue M, Huang YL, Li HX, Zhou SN. Molecular typing and identification of *Bdellovibrio*-  
173 and-like organisms isolated from seawater shrimp ponds and adjacent coastal waters. *Journal of*  
174 *Applied Microbiology* 2009;106(4):1154-1162.

175
